# Supplementary material for: The no-SCAR (Scarless Cas9 Assisted Recombineering) system for genome editing in Escherichia coli
Source: PubMed Central journal article supplement (PMC4604488; doi:10.1038/srep15096), 2015-10-14
Supplement: srep15096-s1.pdf [file srep15096-s1.pdf]

The no-SCAR (Scarless Cas9 Assisted Recombineering) system for genome editing in *Escherichia coli*.

Chris R. Reisch<sup>1</sup> and Kristala L. J. Prather<sup>1,2,\*</sup>

<sup>1</sup>Department of Chemical Engineering, <sup>2</sup>Synthetic Biology Engineering Research Center (SynBERC)

Massachusetts Institute of Technology, Cambridge MA 02139

\*To whom correspondence should be addressed: [kljp@mit.edu](mailto:kljp@mit.edu)

**Supplementary Information**

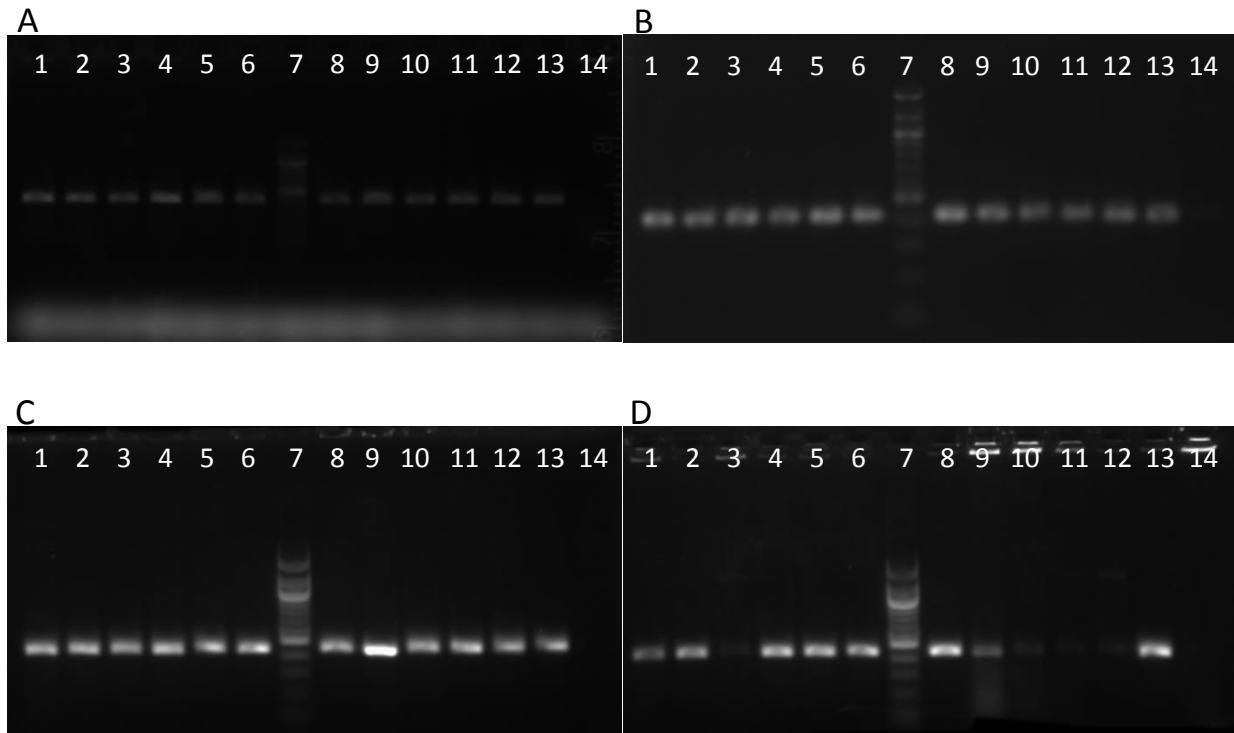

Figure S1. Allele specific genotyping PCR of *ack* point mutations. PCR products were separated on a 1.6% agarose gel. (Top) Colonies from cells that possessed both the pCas9cr4 and pKDsgRNA-*ack* before transforming *ackmut2* oligo. (Bottom) Colonies from cells that possessed only the pKDsgRNA-*ack* plasmid and was then co-transformed with pCas9cr4 and *ackmut2*. The colonies from lanes 3, 10, 11, and 12 were re-screened a second time and 3 of the 4 confirmed to be wild-type. Lane 14 was the wild-type control in which no PCR product was observed. (Lane 7) 100 bp DNA ladder (NEB).

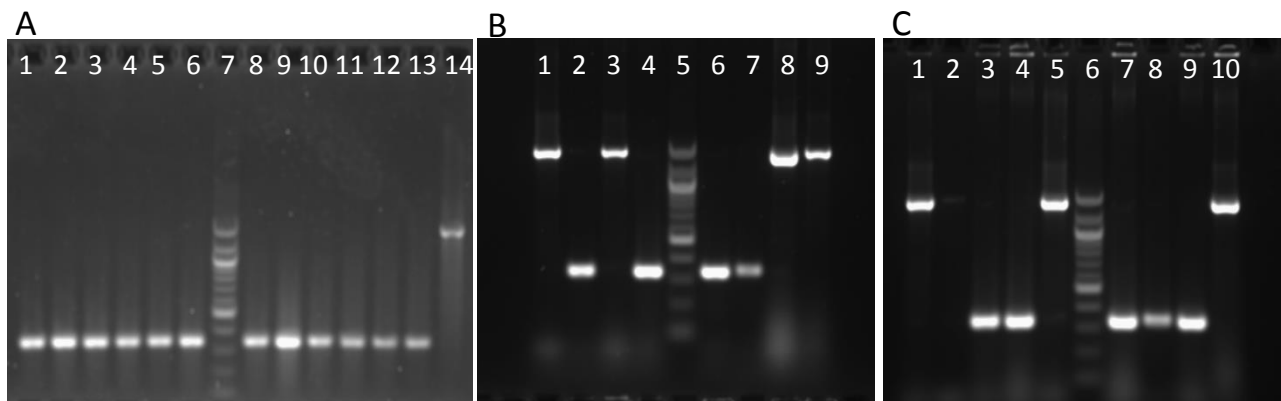

Figure S2. PCR detection of *ack* deletion mutants. PCR products were separated on a 1.6% agarose gel with a 100 bp DNA ladder (NEB). (A) Colonies from cells that possessed both the pCas9cr4 and pKDsgRNA-*ack* before transforming *ackCD* oligonucleotide. Lane 14 possessed a wild-type control. (B + C) Colonies from cells that possessed only the pKDsgRNA-*ack* plasmid and were then co-transformed with pCas9cr4 and *ackCD*.

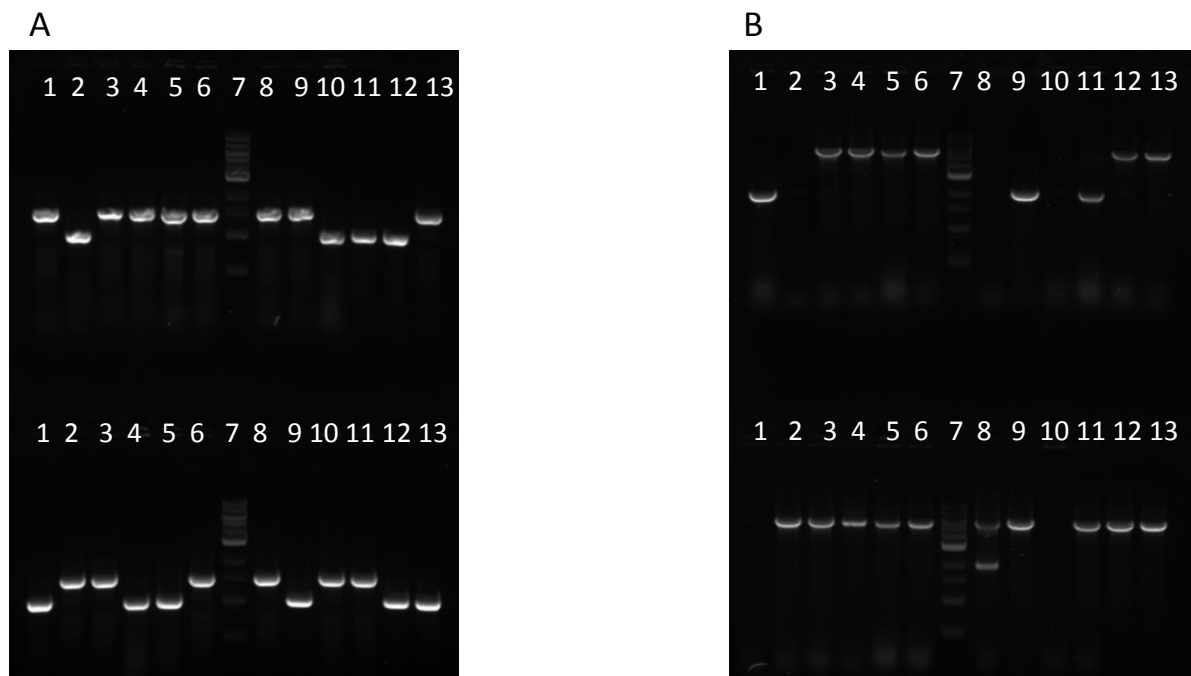

Figure S3. PCR detection of genomic *sspB* and *yqhC-yqhD-dkgA* deletions. PCR products were run on a 0.8% agarose gel. (A) Twenty-four colonies were screened to detect the 477 bp deletion of *sspB*. Ten colonies possessed PCR products of 900 bp, indicating successful deletion of *sspB*, and the remaining 14 colonies had wild-type size of 1400 bp. (B) Twenty-four colonies were screened for the 3200 bp deletion of *yqhC-yqhD-dkgA*. Fifteen colonies possessed wild-type PCR product of 5 kbp, three possessed the 2.2 kbp deletion with a 2 kbp product, one had mix of both products indicating incomplete segregation of the chimeric genotypes, and the PCR reaction failed in 5 of the reactions. A one kb ladder is in lane 7 of each gel.

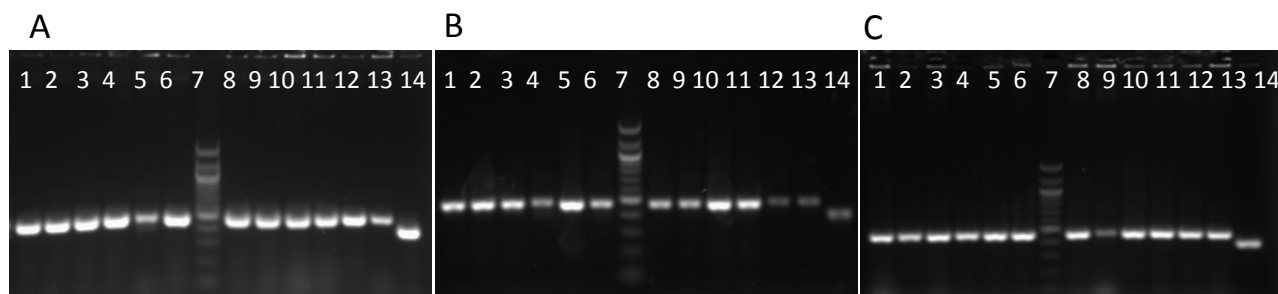

Figure S4. PCR detection of genomic *ssrA* tag insertion at *pfkA*. PCR products were separated on a 1.6% agarose gel with 100 bp ladder in lane 7. (A,B,C) Twelve colonies from three independent experiments were screened by PCR sizing. The wild-type control in lane 14 in each gel shows a size of 391 bp, while all of the experimental colonies have a size increased by 80 bp.

```

1 TCGGTTTCAGGGTAAAGGAATCTGCCTTTTTCCGAAATCAT T----- 42
2 TCGGTTTCAGGGTAAAGGAATCTGCCTTTTTCCGAAATCATACGGCCCCA 50
3 TCGGTTTCAGGGTAAAGGAATCTGCCTTTTTCCGAAATCATACGGCCCCA 50
4 TCGGTTTCAGGGTAAAGGAATCTGCCTTTTTCCGAAATCATACGGCCCCA 50
5 TCGGTTTCAGGGTAAAGGAATCTGCCTTTTTCCGAAATCATACGGCCCCA 50
6 TCGGTTTCAGGGTAAAGGAATCTGCCTTTTTCCGAAATCATACGGCCCCA 50

1 ----- 42
2 AGGTCCAAACGGTGAAGGTACCTTAGCTCGCATCCGCATAGTTTTTCGCTA 100
3 AGGTCCAAACGGTGAAGGTACCTTAGCTCGCATCCGCATAGTTTTTCGCTA 100
4 AGGTCCAAACGGTGAAGGTACCTTAGCTCGCATCCGCATAGTTTTTCGCTA 100
5 AGGTCCAAACGGTGAAGGTACCTTAGCTCGCATCCGCATAGTTTTTCGCTA 100
6 AGGTCCAAACGGTGAAGGTACCTTAGCTCGCATCCGCATAGTTTTTCGCTA 100

1 -----AATACAGTTTTTTTCGCGCAGTCCAGCCAGTC 73
2 TAGTTTTTCATCGTTCGCCGCATACAGTTTTTTTCGCGCAGTCCAGCCAGTC 150
3 TAGTTTTTCATCGTTCGCCGCATACAGTTTTTTTCGCGCAGTCCAGCCAGTC 150
4 TAGTTTTTCATCGTTCGCCGCATACAGTTTTTTTCGCGCAGTCCAGCCAGTC 150
5 TAGTTTTTCATCGTTCGCCGCATACAGTTTTTTTCGCGCAGTCCAGCCAGTC 150
6 TAGTTTTTCATCGTTCGCCGCATACAGTTTTTTTCGCGCAGTCCAGCCAGTC 150

```

**Figure S5. Sequence alignment of the C-terminus of *pfkA*. Line 1 was the wild-type. Lines 2-6 were putative insertion mutants identified by colony PCR. The sequence confirmed insertion of the *ssrA* tag.**

RBS
PAM

```

1 AATTCATTAAAGAGGAGAAAGGATCCATGATTAAGAAAATCGGTGTGTTG
2 AATTCATTAAAGAGGAGAAAGGATCCATGATTAAGAAAATCGGTGTGTTG
3 AATTCATTAAAGAGGAGAAAGGATCCATGATTAAGAAAATCGGTGTGTTG
4 AATTCATTAAAGAGGAGAAAGGATCCATGATTAAGAAAATCGGTGTGTTG
5 AATTCATTAAAGAGGAGAAAGGATCCATGATTAAGAAAATCGGTGTGTTG
6 AATTCATTAAAGAGGAGAAAGGATCCATGATTAAGAAAATCGGTGTGTTG
7 AATTCATTAAAGAGGAGAAAGGATCCATGATTAAGAAAATCGGTGTGTTG
8 AATTCATTAAAGAGGAGAAAGGATCCATGATTAAGAAAATCGGTGTGTTG
9 AATTCATTAAAGAGGAGAAAGGATCCATGATTAAGAAAATCGGTGTGTTG
10 AATTCATTAAAGAGGAGAAAGGATCCATGATTAAGAAAATCGGTGTGTTG
11 AATTCATTAAAGAGGAGAAAGGATCCATGATTAAGAAAATCGGTGTGTTG
12 AATTCATTAAAGAGGAGAAAGGATCCATGATTAAGAAAATCGGTGTGTTG
13 AATTCATTAAAGAGGAGAAAGGATCCATGATTAAGAAAATCGGTGTGTTG
14 AATTCATTAAAGAGGAGAAAGGATCCATGATTAAAGAAATCGGTGTGTTG
15 AATTCATTAAAGAGGAGAAAGGATCCATGATTAAAGAAATCGGTGTGTTG
16 AATTCATTAAAGAGGCAGAAAGGATCCATGATTAAAGAAATCGGTGTGTTG
17 AATTCATTAAAGAGGAGAAAGGATCCATGATTAAAGAAATCGGTGTGTTG
18 AATTCATTAAAGAGTGAGAAAGGATCCATGATTAAAGAAATCGGTGTGTTG
19 AATTCATTAAAGAGTTGAAAGGATCCATGATTAAAGAAATCGGTGTGTTG
20 AATTCATTAAAGAGTCGAAAGGATCCATGATTAAAGAAATCGGTGTGTTG
21 AATTCATTAAAGAGTTGAAAGGATCCATGATTAAAGAAATCGGTGTGTTG
22 AATTCATTAAAGAGGCAGAAAGGATCCATGATTAAAGAAATCGGTGTGTTG
23 AATTCATTAAAGAGGCAGAAAGGATCCATGATTAAAGAAATCGGTGTGTTG
24 AATTCATTAAAGAGTTGAAAGGATCCATGATTAAAGAAATCGGTGTGTTG

```

**Figure S6. Sequence alignment of 23 putative *pfkE* RBS mutants. Line 1 is the wild-type sequence. Lines 2-13 were putative mutants that had the wild-type sequence. Lines 14,15, and 17 had the silent mutations but possessed the wild-type RBS sequence. Lines 16, 18-24 possessed the silent mutations and mutations in the RBS.**

Table S1. Plasmids constructed in this study.

| Plasmid Name  | Origin of Replication | Antibiotic Resistance | Plasmid Description                                  |
|---------------|-----------------------|-----------------------|------------------------------------------------------|
| pKDsg-pfkAEnd | pSC101                | Spec/Strep            | Protospacer targeting downstream of <i>pfkA</i>      |
| pKDsg-Ack     | pSC101                | Spec/Strep            | Protospacer targeting <i>ack</i>                     |
| pKDsg-Apt     | pSC101                | Spec/Strep            | Protospacer targeting <i>apt</i>                     |
| pKDsg-rpoB    | pSC101                | Spec/Strep            | Protospacer targeting <i>rpoB</i>                    |
| pKDsg-p15A    | pSC101                | Spec/Strep            | Protospacer targeting the p15A origin of replication |
| pCas9         | p15A                  | Cm                    | Nuclease positive <i>cas9</i>                        |
| pCas9cr1      | p15A                  | Cm                    | pCas9 with <i>ssrA</i> tag                           |
| pCas9cr2      | p15A                  | Cm                    | pCas9cr1 with constitutive <i>tetR</i>               |
| pCas9cr4      | p15A                  | Cm                    | pCas9cr2 with 10-fold reduced RBS                    |
|               |                       |                       |                                                      |

Table S2. Primers used for construction of sgRNA plasmids

| Primer Name    | Oligonucleotide Sequence                       |
|----------------|------------------------------------------------|
| Pkdseq1        | ccaattgtccatattgcatca                          |
| betaR          | ttataacctccttagagctcga                         |
| P15AF sgRNA    | ctatcgtcttgagtccaaccgttttagagctagaaatagcaag    |
| P15A ptet      | ggttgactcaagacgataggtgctcagtatctctatcactGA     |
| pfka end F     | GTATtaaTGATTTTCGGAAAgttttagagctagaaatagcaag    |
| pfka end Rptet | TTTTCCGAAATCAttaATACgtgctcagtatctctatcactGA    |
| aptR ptet      | GCTTActggAAGACCCGAAAgctcagtatctctatcactGA      |
| aptF sgRNA     | TTTCGGGTCTTccagTAAGCgttttagagctagaaatagcaagtta |
| ackF sgRNA     | AATAAACAGGAAGCGGCTTTgttttagagctagaaatagcaag    |
| ackR ptet      | AAAGCCGCTTCCTGTTTATTgtgctcagtatctctatcactGA    |
|                |                                                |

**Table S3. Primers used for genotyping PCR**

| <b>Primer Name</b> | <b>Oligonucleotide sequence</b> |
|--------------------|---------------------------------|
| aptFmut            | gcgatgtcaccagcttagtct           |
| aptR               | cgtccaccaccagaactttg            |
| ackFmut            | GAAAATGGACGGCAATAAAGACT         |
| ackR               | ACATAGAAGTGGCTGGTGCC            |
| ack Up F           | CATGCGCTACGCTCTATGG             |
| ack Down R         | CGCCTTTGCGTTCCATTGC             |
| pfkA Down F        | cgctatcgatctgctgct              |
| pfkA Down R        | gcagaattcatgtaggcctg            |
|                    |                                 |

**Table S4. Oligonucleotides used for chromosomal mutations**

| <b>Primer Name</b> | <b>Oligonucleotide sequence (*indicates phosphorothioate bond)</b>                       |
|--------------------|------------------------------------------------------------------------------------------|
| rpoB               | C*C*AGCAAGTCGATGCTGAGAGCGTAAGCTTTCGGGTCTTAGACTAAGCTGGTGACATCGCG<br>GAAAAGAATGCCG*G*G     |
| ackmut2            | C*C*CGAAGCACGTATCAAATGGAAAATGGACGGCAATAAAGACTAAGCGGCTTTAGGTGCA<br>GGCGCCGCTCACAG*C*G     |
| ackCD              | G*T*TAGTACTGGTTCTGAACTGCGGTAGTTCTTCACTGGTTATCCCAACCAACGAAGAACTGG<br>TTATCGC*G*C          |
| pfkaRBS            | C*G*CATCACCGCCGCTTGTCAACACACCGATCTTTTTAATCATGGATCCTTTCNNCTCTTTAATG<br>AATTGGCTAAACAA*C*T |
